# Supplementary material for: Quantitative Analysis of Methodological and Environmental Influences on Survival of Planted Mangroves in Restoration and Afforestation
Source: MDPI journal article supplement (doi:10.3390/f13030404), 2022-03-02
Supplement: s1 [file s1]

## Supplementary Materials

**Table S1.** Mangrove genera classified into different root morphologies analysed in this review.

| Root type classification | Genus               | Species                |
|--------------------------|---------------------|------------------------|
| Pencil-roots             | <i>Avicennia</i>    | <i>A. alba</i>         |
|                          |                     | <i>A. germinans</i>    |
|                          |                     | <i>A. marina</i>       |
|                          |                     | <i>A. officinalis</i>  |
|                          |                     | <i>A. schaueriana</i>  |
|                          | <i>Laguncularia</i> | <i>L. racemosa</i>     |
|                          | <i>Sonneratia</i>   | <i>S. alba</i>         |
|                          |                     | <i>S. apelata</i>      |
| Stilt-roots              | <i>Aegiceras</i>    | <i>A. corniculatum</i> |
|                          | <i>Kandelia</i>     | <i>K. candel</i>       |
|                          | <i>Rhizophora</i>   | <i>R. apiculata</i>    |
|                          |                     | <i>R. mangle</i>       |
|                          |                     | <i>R. mucronata</i>    |
|                          |                     | <i>R. racemosa</i>     |
|                          |                     | <i>R. stylosa</i>      |
| Knee-roots               | <i>Bruguiera</i>    | <i>B. cylindrica</i>   |
|                          |                     | <i>B. gymnorrhiza</i>  |
|                          |                     | <i>B. parviflora</i>   |
|                          |                     | <i>B. sexangula</i>    |
|                          |                     | <i>C. australis</i>    |
|                          | <i>Ceriops</i>      | <i>C. decandra</i>     |
|                          |                     | <i>C. tagal</i>        |
|                          |                     | <i>X. moluccensis</i>  |
|                          | <i>Xylocarpus</i>   |                        |

**Table S2.** Number of recorded from studies (by country) including in the meta-analysis conducted in this review.

| <b>Study</b>                | <b>Country</b>       | <b>No. of Records</b> |
|-----------------------------|----------------------|-----------------------|
| Chan 1988                   | Malaysia             | 3                     |
| Chenani et al., 2011        | Iran                 | 1                     |
| Chithambaran 2019           | Saudi Arabia         | 11                    |
| Chowdhury et al., 2018      | India                | 5                     |
| Das et al., 1997            | India                | 18                    |
| Erftemeijer et al., 2018    | Australia            | 4                     |
| Fan 2007                    | China                | 2                     |
| Fernandes et al., 2007      | Brazil               | 7                     |
| Gilman & Ellison 2007       | American Samoa       | 2                     |
| Goforth & Thomas 1980       | Florida              | 6                     |
| Hashim et al., 2010         | Malaysia             | 1                     |
| Huber 2004                  | Brazil               | 11                    |
| Jintana et al., 1995        | Thailand             | 4                     |
| Kainuma et al., 2013        | Republic of Kiribati | 1                     |
| Kirui et al., 2008          | Kenya                | 3                     |
| Kitaya et al., 2006         | Vietnam              | 25                    |
| Komiyama et al., 1996       | Thailand             | 5                     |
| Kumara et al., 2010         | Sri Lanka            | 4                     |
| Lang'at et al., 2009        | Kenya                | 1                     |
| Lewis 1979                  | Virgin Island        | 1                     |
| Loi et al., 2019            | Vietnam              | 4                     |
| Macy et al., 2021           | Louisiana            | 3                     |
| Matsui et al., 2012         | Thailand             | 4                     |
| McGuinness 1997             | Australia            | 3                     |
| Meinardi 2010               | Vietnam              | 10                    |
| Menezes et al., 2005        | Brazil               | 7                     |
| Miah & Moula 2020           | Bangladesh           | 2                     |
| Miah et al., 2014           | Bangladesh           | 5                     |
| Naohiro et al., 2012        | Thailand             | 3                     |
| Osunkoya & Creese 1997      | New Zealand          | 8                     |
| Padron 1996                 | Cuba                 | 4                     |
| Paludo & Klonowski 1999     | Brazil               | 8                     |
| Pramudji and Dharmawan 2016 | Indonesia            | 2                     |
| Rasool et al., 2002         | Pakistan             | 9                     |
| Ren et al., 2009            | China                | 6                     |
| Saenger 1996                | Australia            | 2                     |
| Saenger & Siddiqi 1993      | Bangladesh           | 5                     |
| Stephen 1984                | Florida              | 1                     |
| Stevenson et al., 1999      | Thailand             | 3                     |

|                        |         |            |
|------------------------|---------|------------|
| Than et al., 2006      | Myanmar | 5          |
| Thuy & Loc 2007        | Vietnam | 2          |
| Toledo et al., 2001    | Mexico  | 1          |
| Tovilla Hernández 2016 | Mexico  | 5          |
| Untawale 1996          | India   | 6          |
| Zabbey & Tanee 2016    | Nigeria | 2          |
| <b>TOTAL</b>           |         | <b>225</b> |

---

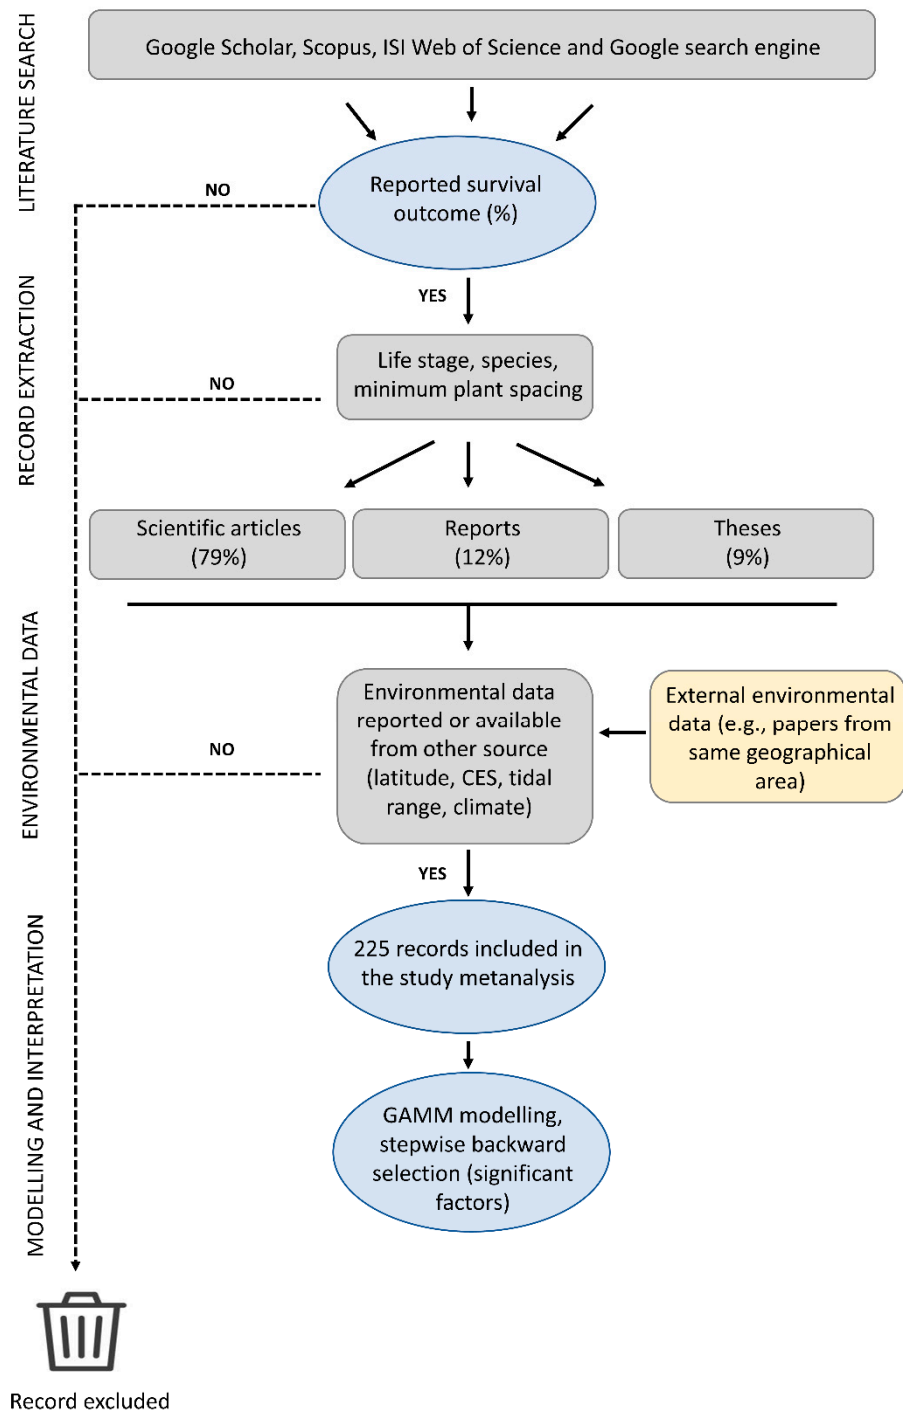

**Figure S1.** Selection and standardization of data used in the meta-analysis and subsequent interpretation of mangrove survival trends for mangrove species with different root morphologies

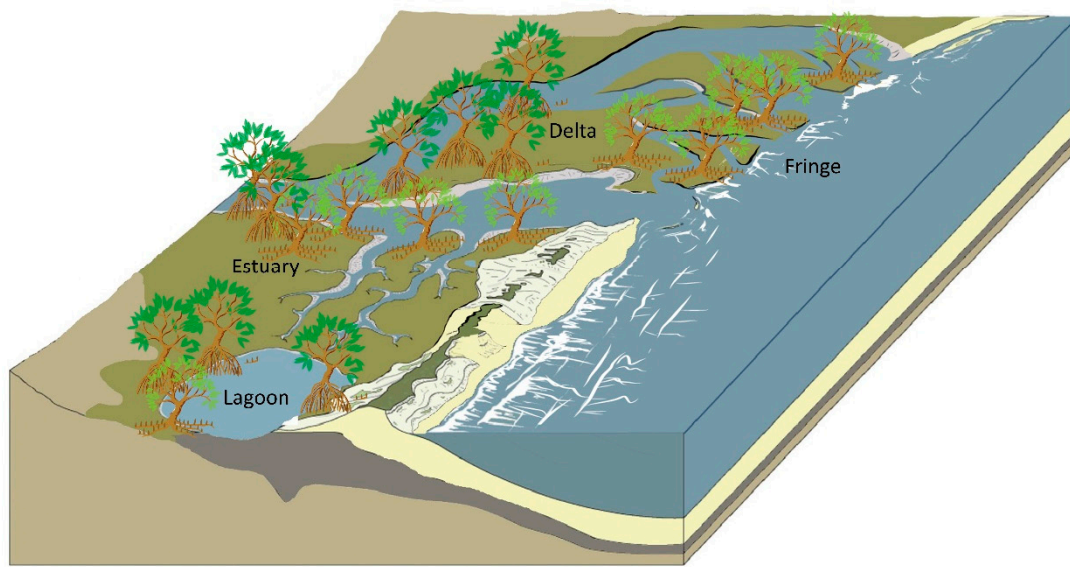

**Figure S2.** Spatial representation of different Coastal Environmental Settings (CES) used in analysis of survival of restored mangroves with different root morphologies.
